# Supplementary material for: Phase II, randomized, placebo-controlled study of dovitinib in combination with fulvestrant in postmenopausal patients with HR+, HER2− breast cancer that had progressed during or after prior endocrine therapy
Source: Springer Nature journal article supplement (doi:10.1186/s13058-017-0807-8), 2017-02-10
Supplement: MOESM1 [file 12058996]

**Figure S1. Data analysis**

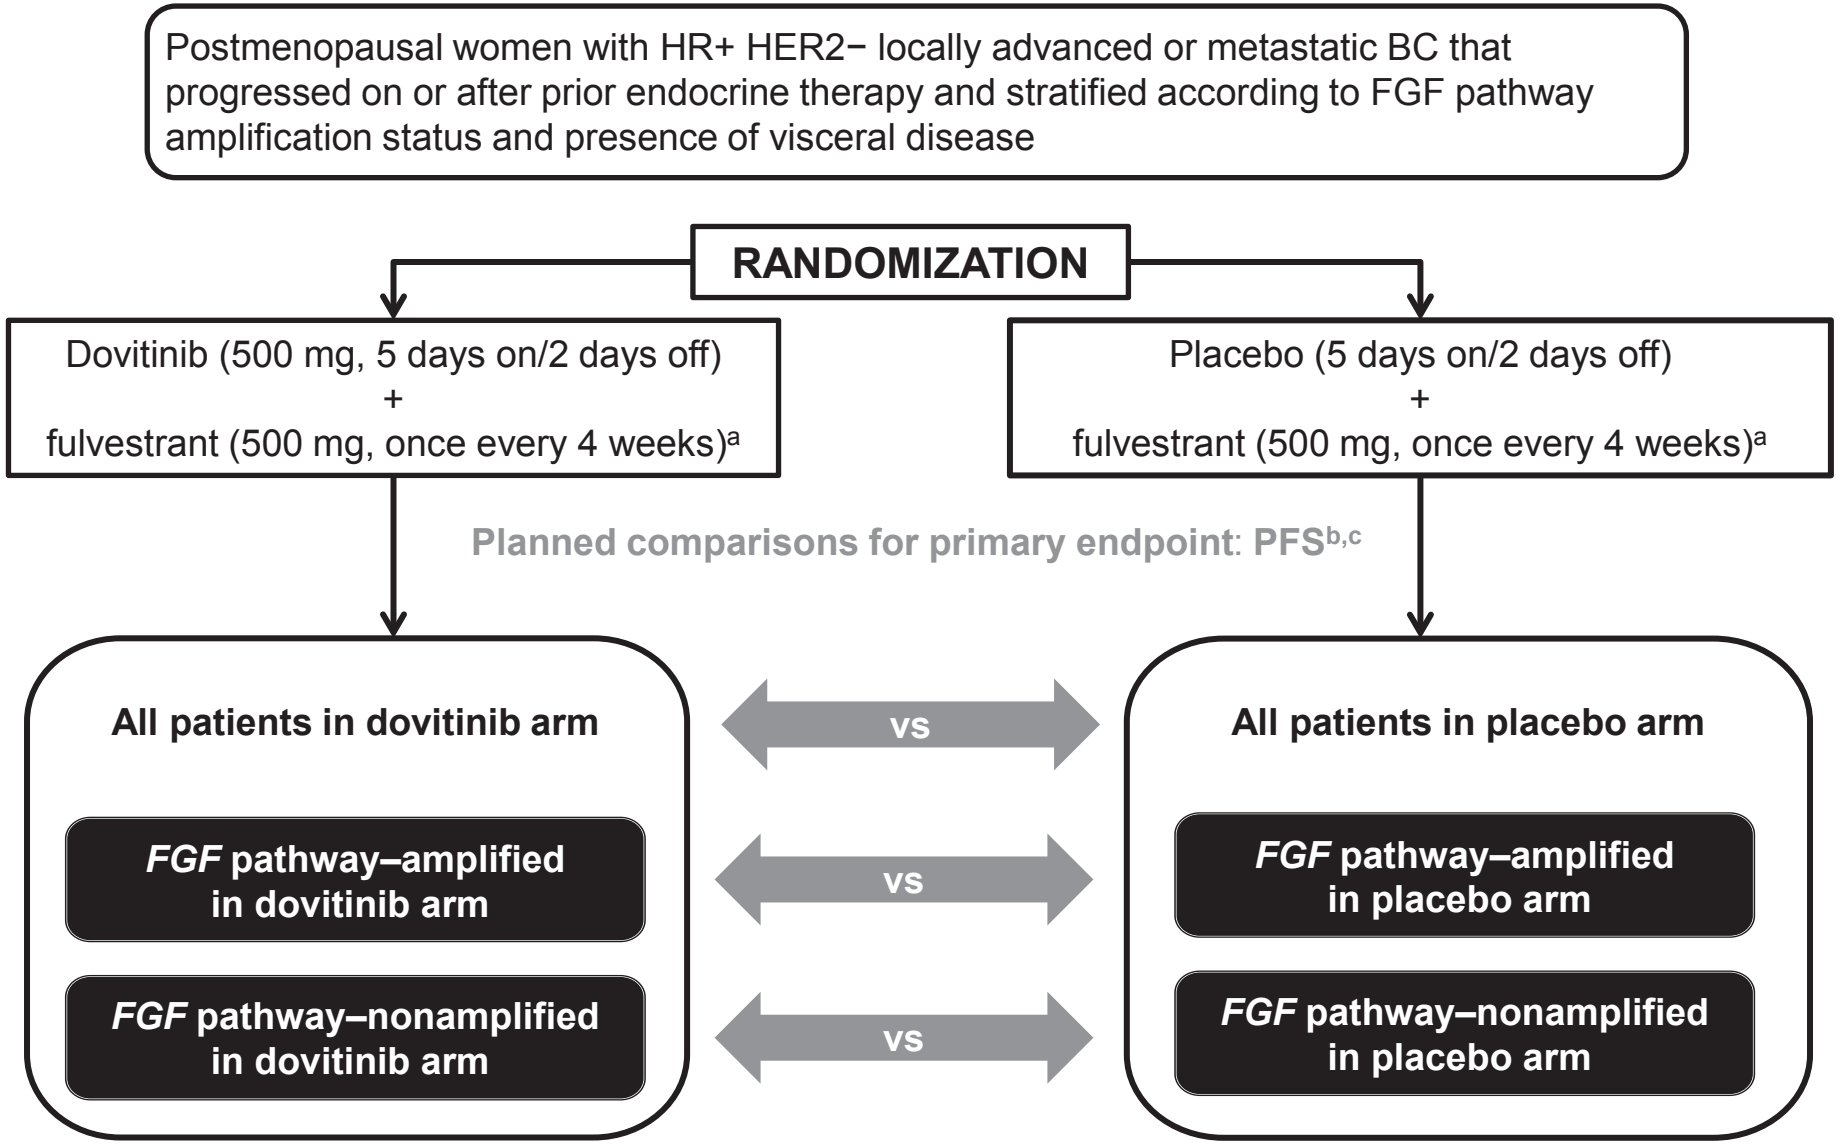

<sup>a</sup> Fulvestrant was given once every 4 weeks with one additional dose 2 weeks after the initial dose  
<sup>b</sup> Survival follow-up data to be collected until 1 year after final data analysis data-cutoff data or until all patients discontinued treatment, whichever comes first.  
<sup>c</sup> Final analysis planned after ≥90 PFS events, including ≥50 events from *FGF*-amplified patients.  
FGF, fibroblast growth factor; HER2, human epidermal growth factor receptor 2; HR, hormone receptor; PFS, progression-free survival.
